# Supplementary material for: Smarcd3 is an epigenetic modulator of the metabolic landscape in pancreatic ductal adenocarcinoma
Source: PubMed Central journal article supplement (PMC9849267; doi:10.1038/s41467-023-35796-7), 2023-01-18
Supplement: 41467_2023_35796_MOESM1_ESM.pdf [file 41467_2023_35796_MOESM1_ESM.pdf]

a. *SMARCD3* is targeted for amplifications in cancer

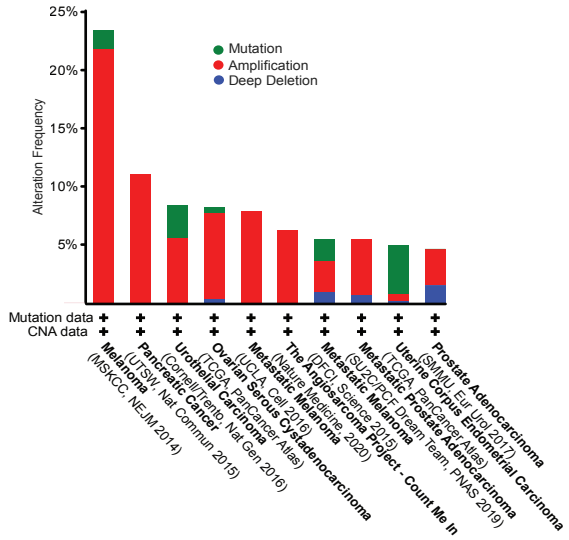

b. Nuclear SMARCA4 is equivalently expressed in stem and non-stem primary *KP<sup>fl</sup>C* tumor cells

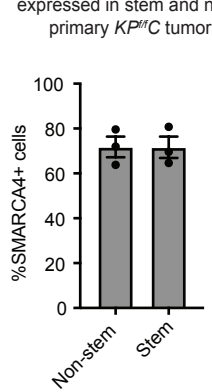

c. *Smarcd3* RNA expression is upregulated in the stem cell fraction of primary *KP<sup>fl</sup>C* tumors: *qPCR*

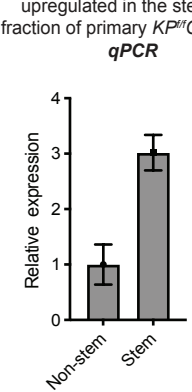

d. Nuclear SMARCD3 expression is upregulated in the stem cell fraction of primary *KP<sup>fl</sup>C* tumors: **Biological replicate**

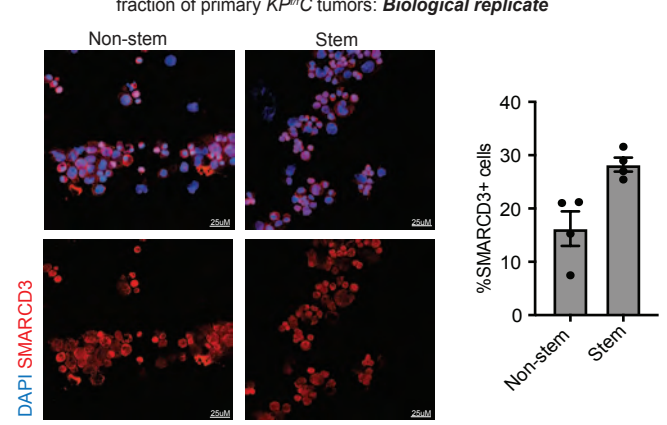

e. shRNA knockdown of *Smarcd3* in *KP<sup>fl</sup>C* cells: *qPCR*

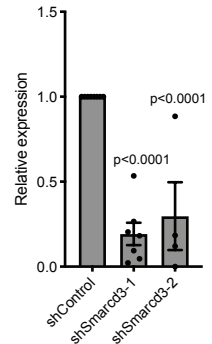

f. shRNA knockdown of *Smarcd3* in *KP<sup>fl</sup>C* cells: **Western blot**

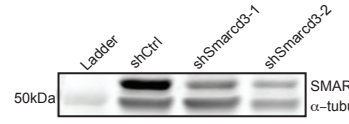

g. *Smarcd3* shRNA do not inhibit *Smarcd1*, *Smarcd2* expression: **Western blot**

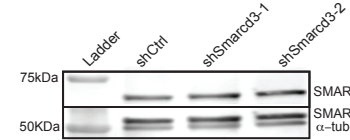

h. Inhibition of *Smarcd3* increases apoptosis of *KP<sup>fl</sup>C* stem cells *in vitro*

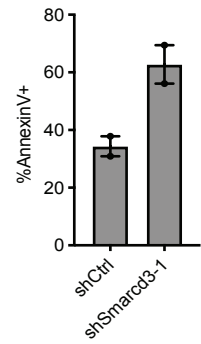

i. Inhibition of *Smarcd3* blocks tumor growth of *KP<sup>fl</sup>C* stem cells *in vivo*: **Biological replicate #2**

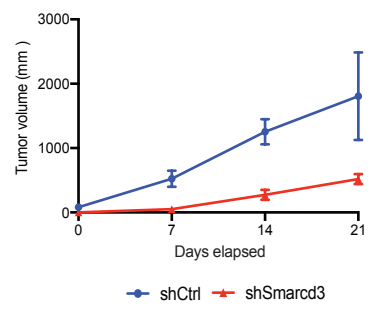

j. Inhibition of *Smarcd3* blocks tumor growth of *KP<sup>fl</sup>C* stem cells *in vivo*: **Biological replicate #3**

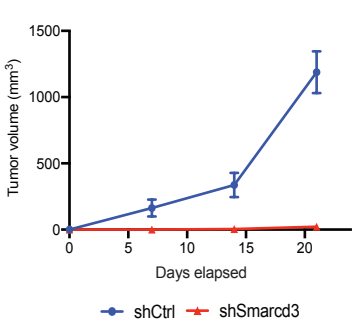

k. *SMARCD3* overexpression: *qPCR*

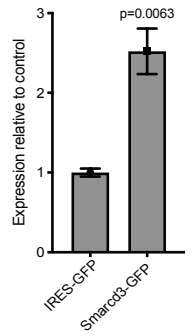

l. *SMARCD3* overexpression in *KP<sup>fl</sup>C* cells *in vitro*

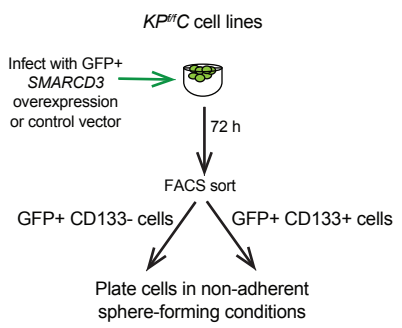

m. *SMARCD3* overexpression enhances 3D growth of *KP<sup>fl</sup>C* cells

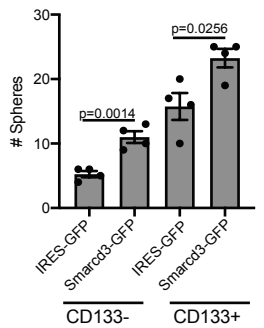

n. *SMARCD3* overexpression sustains CD133+ *KP<sup>fl</sup>C* cells *in vitro*

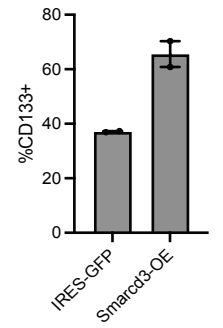

### **Supplementary Figure 1: SMARCD3 is a functional epigenetic dependency in PDAC**

- a. *SMARCD3* is targeted for amplifications in clinical cancer cases (top 10 studies with the highest frequency of *SMARCD3* alteration, cBioPortal; see Figure 1d).
- b. *SMARCA4* is equivalently expressed in stem and non-stem *KP<sup>fl/fl</sup>* C tumor cells. Stem (CD133+) and non-stem (CD133-) EpCAM+ tumor cells were sorted from primary *KP<sup>fl/fl</sup>* C tumors and analyzed for nuclear *SMARCA4* expression by immunofluorescence (n=3 frames, n=1 biological replicate, mean ± SEM).
- c. *Smarcd3* expression is upregulated within the stem cell fraction of a primary *KP<sup>fl/fl</sup>* C tumor. Stem (CD133+) and non-stem (CD133-) *KP<sup>fl/fl</sup>* C tumor cells were sorted; *Smarcd3* expression assessed by qPCR (n=1 biological replicate at n=2, mean ± SEM).
- d. Nuclear *SMARCD3* expression is upregulated the stem cell fraction of primary *KP<sup>fl/fl</sup>* C tumors. DAPI (blue), *SMARCD3* (red); tumor cells with positive staining for *SMARCD3* in the nucleus were counted (n=2 biological replicates, n=3 frames; mean ± SEM). See Figure 1f.
- e. *Smarcd3* knockdown in *KP<sup>fl/fl</sup>* C cells *in vitro*: qPCR (biological replicates are n=7 for shSmarcd3-1 and n=4 for shSmarcd3-4 at n=3 each; 2-way ANOVA with multiple comparisons, mean ± SEM).
- f. *Smarcd3* knockdown in *KP<sup>fl/fl</sup>* C cells: Western blot (representative of n=2).
- g. *Smarcd3* shRNA are specific and do not reduce *SMARCD1* or *SMARCD2* expression in *KP<sup>fl/fl</sup>* C cells: western blot (representative of n=2).
- h. *Smarcd3* knockdown increases apoptosis (Annexin V positivity) of CD133+ *KP<sup>fl/fl</sup>* C cells *in vitro* (n=2, mean ± SEM).
- i. *Smarcd3* knockdown blocks growth of *KP<sup>fl/fl</sup>* C stem cells *in vivo*. Biological replicate #2. *Smarcd3* knockdown blocks growth of Msi2+ *KP<sup>fl/fl</sup>* C flank transplants (n=2 shCtrl, n=4 shSmarcd3, mean ± SEM; n=3 biological replicates, see Supplementary Figure 1j, Figure 1j).
- j. *Smarcd3* knockdown blocks growth of *KP<sup>fl/fl</sup>* C stem cells *in vivo*. Biological replicate #3. *Smarcd3* knockdown blocks growth of Msi2+ *KP<sup>fl/fl</sup>* C flank transplants (n=4 shCtrl, n=2 shSmarcd3, mean ± SEM; n=3 biological replicates, see Supplementary Figure 1i, Figure 1j).
- k. *SMARCD3* overexpression in *KP<sup>fl/fl</sup>* C cells *in vitro*: qPCR *KP<sup>fl/fl</sup>* C cells were transduced with lentiviral GFP-tagged *SMARCD3* overexpression vector or empty GFP control and collected for qPCR analysis; one biological replicate (n=3, mean ± SEM).
- l. *SMARCD3* overexpression in *KP<sup>fl/fl</sup>* C cells *in vitro*.
- m. *SMARCD3* overexpression enhances 3D growth of CD133- and CD133+ *KP<sup>fl/fl</sup>* C cells *in vitro*. *KP<sup>fl/fl</sup>* C cells transduced with *SMARCD3-GFP* or empty GFP vectors were plated in sphere-forming assay (representative of 4 biological replicates; n=4, two-tailed T-tests, mean ± SEM).
- n. *SMARCD3* overexpression sustains CD133+ *KP<sup>fl/fl</sup>* C cells *in vitro*. *KP<sup>fl/fl</sup>* C cells transduced with *SMARCD3-GFP* or empty GFP vectors were sorted on CD133+ and plated in 2D. %CD133+ positivity was assessed by FACS after 72 h (2 biological replicates; n=2 each, mean ± SEM).

All source data are provided in the Source Data file.

**a.** *Smarcd3* deletion in the context of embryonic *Kras* mutation does not significantly impact PanIN formation

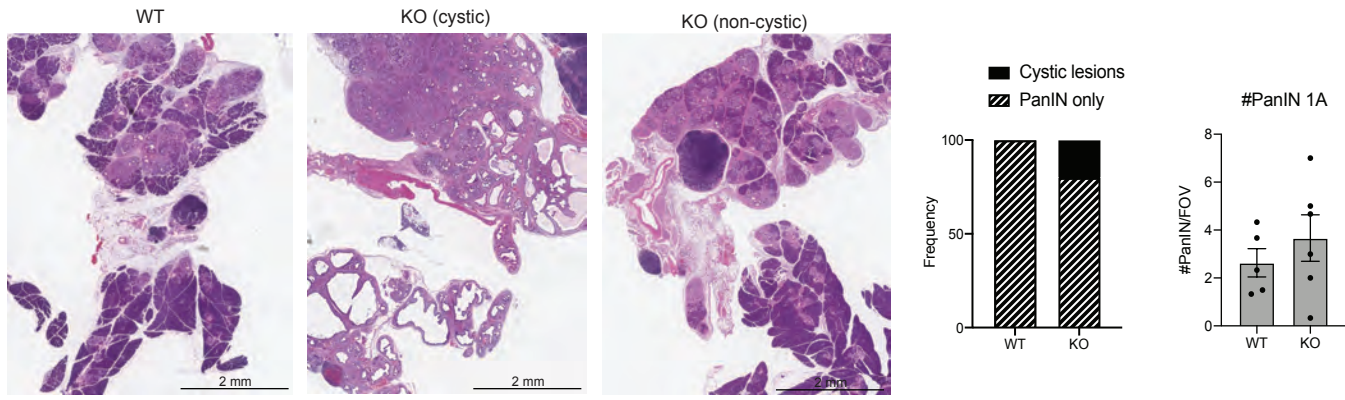

**b.** *Smarcd3* deletion and *Kras* activation does not impact acinar-driven PanIN development in adult mice

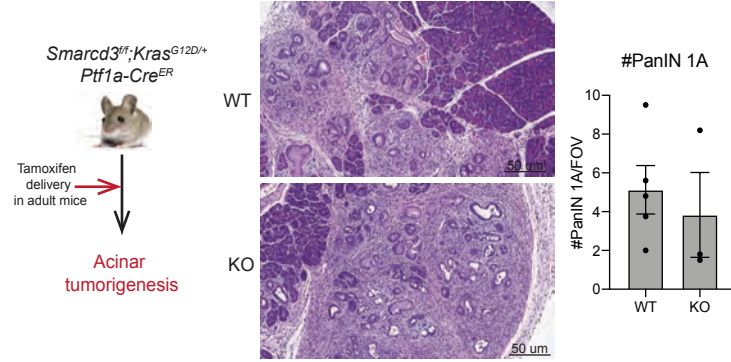

**c.** *Smarcd3* deletion and *Kras* activation does not impact ductal-driven PanIN development in adult mice

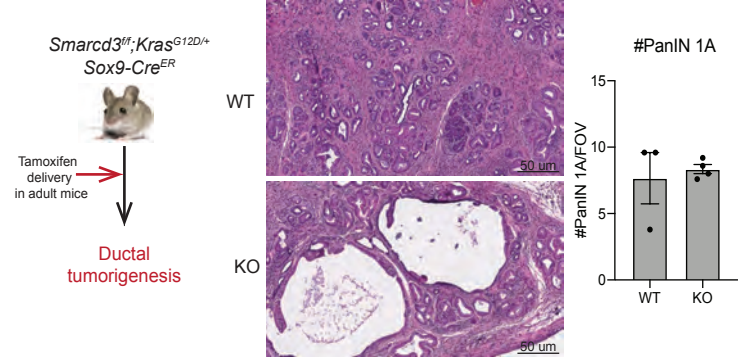

**d.** SMARCD3 is not expressed in *Smarcd3*<sup>KO</sup>-*KP<sup>fl</sup>C* tumors

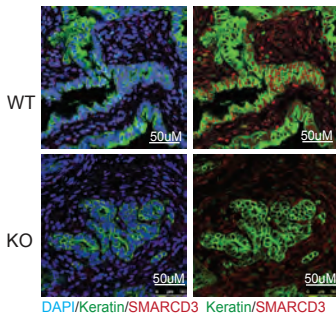

**e.** *Smarcd3* recombination is restricted to tumor cells

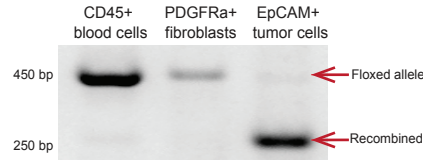

**f.** Gating strategy for the analysis of primary and secondary mouse tumors

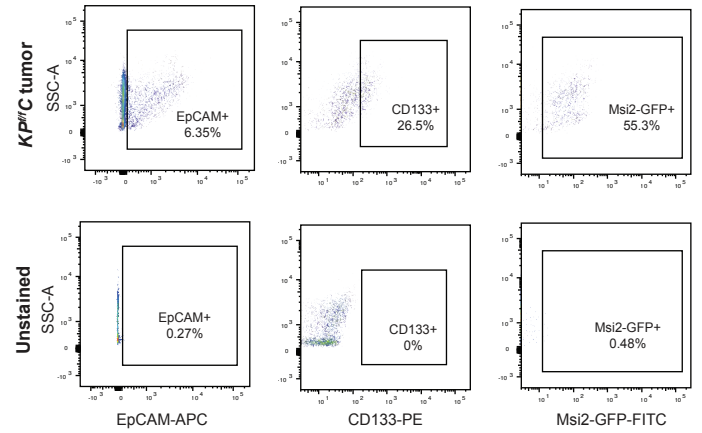

**g.** *Smarcd3*<sup>fl</sup> allele is recombined upon tamoxifen treatment *in vivo*

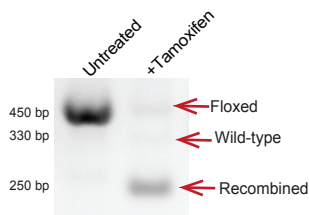

**h.** Inducible *Smarcd3* deletion in *KPF* tumors *in vivo*

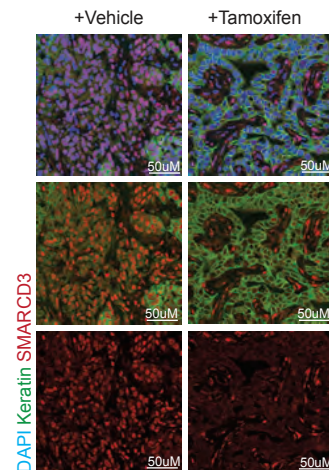

**i.** Re-expression of SMARCD3 in *KPF* transplant after inducible deletion *in vivo*

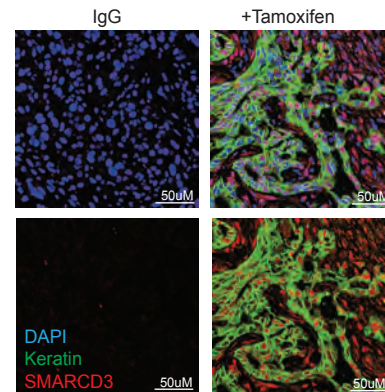

## Supplementary Figure 2: Genetic deletion of *Smarcd3* impairs tumor growth

- a. *Smarcd3* deletion in the context of embryonic *Kras* mutation does not impact PanIN formation. *Smarcd3*<sup>WT</sup> (WT) and *Smarcd3*<sup>KO</sup> (KO) *Kras*<sup>G12D/+</sup>; *Ptf1a-Cre* (KC) mice (9-10 weeks) were analyzed for morphology and PanIN grade/number (n=8 WT and n=10 KO mice for histological analysis; n=5 WT and n=6 KO mice for analysis of PanIN 1A, representative of n=3 fields of view, mean ± SEM, scale bar = 2mm).
- b. *Smarcd3* deletion with *Kras* mutation does not impact acinar-driven PanIN development in adult mice. *Smarcd3*<sup>WT</sup> (WT) and *Smarcd3*<sup>KO</sup> (KO) *Kras*<sup>G12D/+</sup>; *Ptf1a-CreER*<sup>T2</sup> mice (8 weeks of age) were treated with tamoxifen to induce *Smarcd3* deletion and *Kras* mutation in adult acinar cells. 90 days post-induction, pancreatic tissue was isolated for analysis of PanIN grade/number (representative of n=5 fields of view, n=5 WT and n=3 KO mice, mean ± SEM, scale bar = 50um).
- c. *Smarcd3* deletion with *Kras* mutation does not impact ductal-driven PanIN development in adult mice. *Smarcd3*<sup>WT</sup> (WT) and *Smarcd3*<sup>KO</sup> (KO) *Kras*<sup>G12D/+</sup>; *Sox9-CreER*<sup>T2</sup> mice (8 weeks of age) were treated with one dose of 150mg/kg tamoxifen to induce *Smarcd3* deletion and *Kras* mutation in adult pancreatic ductal cells. 90 days post-induction, pancreatic tissue was isolated for analysis of PanIN grade/number (representative of n=5 fields of view for n=3 WT and n=4 KO mice per genotype, mean ± SEM, scale bar = 50um).
- d. SMARCD3 is not expressed in *Smarcd3*<sup>KO</sup>-*KP*<sup>ff</sup>*C* tumors. SMARCD3 (red) staining in tumor cells (pan-keratin+, green) of end-stage *Smarcd3*<sup>WT</sup>-*KP*<sup>ff</sup>*C* (WT) and *Smarcd3*<sup>KO</sup>-*KP*<sup>ff</sup>*C* (KO) tumors; DAPI (blue) (representative, n=3 mice, scale bar = 50um).
- e. *Smarcd3* recombination is restricted to tumor cells in *Smarcd3*<sup>ff</sup>-*KP*<sup>ff</sup>*C* mice. To confirm that *Smarcd3* recombination was restricted to pancreatic tumor cells, *Smarcd3*<sup>ff</sup>-*KP*<sup>ff</sup>*C* tumors were stained and sorted for CD45+ blood cells, PDGFRα+ fibroblasts and EpCAM+ tumor cells; PCR was used to detect *Smarcd3* recombination which was restricted to EpCAM+ tumor cells (representative, n=2).
- f. Gating strategy for all primary and secondary mouse tumors. Representative FACS plots demonstrate the gating strategy used for the analysis of tumor (EpCAM-APC+) and CD133+ (CD133-PE+) and Msi2+ (Msi2-GFP+) tumor stem cells in primary (Figure 2a,b) and secondary (Figure 2c,d) *Smarcd3*<sup>WT</sup> and *Smarcd3*<sup>KO</sup>-*KP*<sup>ff</sup>*C* tumors. FACS plots for unstained tumor cells are shown as a control. Plots are shown for populations that were first gated through morphology (FSC-A/SSC-A), single cell (FSC-A/FSC-H) and live cell (Propidium iodide negative) gates. This gating strategy was applied to the analysis of tumors from all following genetically engineered mouse models and transplants.
- g. *Smarcd3*<sup>ff</sup> allele is recombined upon tamoxifen treatment *in vivo*. EpCAM+ tumor cells were isolated from tamoxifen-treated *Smarcd3*<sup>ff</sup>-*KPF-R26-CreER*<sup>T2</sup> flank transplants for PCR (representative, n=6).
- h. Tamoxifen delivery drives *Smarcd3* deletion in the *KPF* model *in vivo*. SMARCD3 expression (red) in tumor cells (pan-keratin+, green) of *Smarcd3*<sup>ff</sup>-*KPF-R26-CreER*<sup>T2</sup> flank transplants treated with tamoxifen or vehicle; DAPI (blue) (representative, n=1 biological replicate, n=6 transplants stained, scale bar = 50um).
- i. SMARCD3 is re-expressed in *KPF* transplant after inducible deletion *in vivo*. SMARCD3 expression (red) in tumor cells (pan-keratin+, green) of *Smarcd3*<sup>ff</sup>-*KPF-R26-CreER*<sup>T2</sup> flank transplant treated with tamoxifen; DAPI (blue) (representative, n=1 biological replicate, n=6 transplants stained; one of three tamoxifen-treated transplants re-expressed SMARCD3, scale bar = 50um).

All source data are provided as a Source Data file.

a. SMARCD3+ cells are enriched within the epithelial stem fraction of human PDAC tumors by single-cell RNAseq

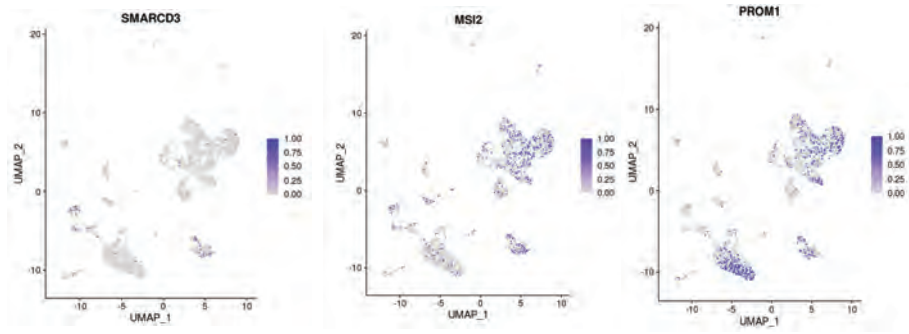

b. SMARCD3 expression in a human tissue microarray

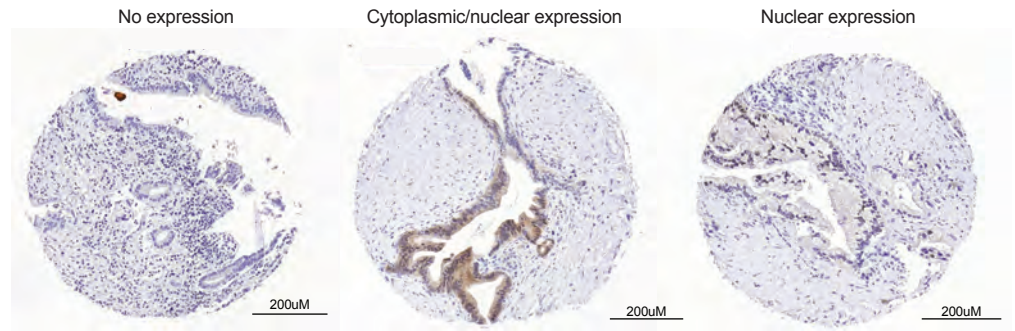

c. SMARCD3 expression is elevated within KRAS<sup>MUTANT</sup> human pancreatic tumors

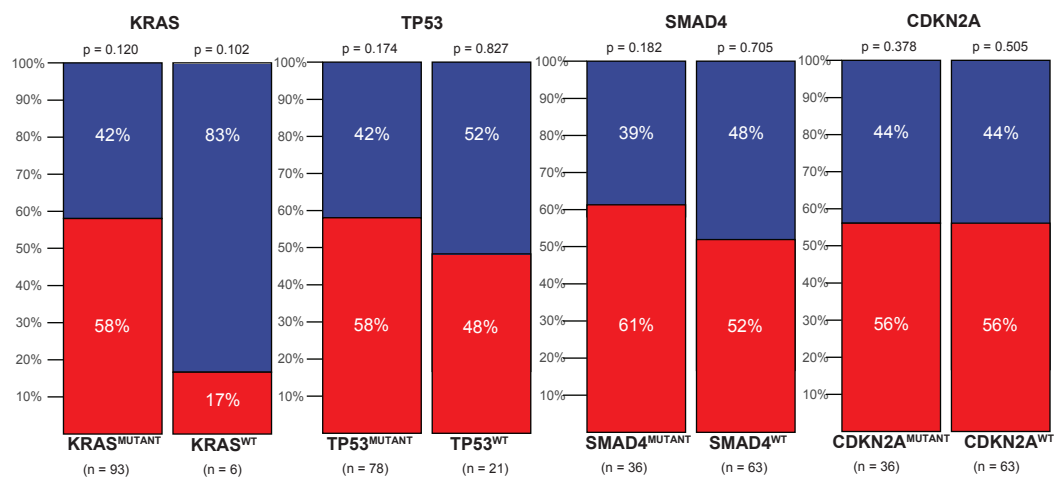

SMARCD3 expression

■ No expression  
■ Expressed

d. SMARCD3 is expressed in the context of mutant Kras alone in GEMMs

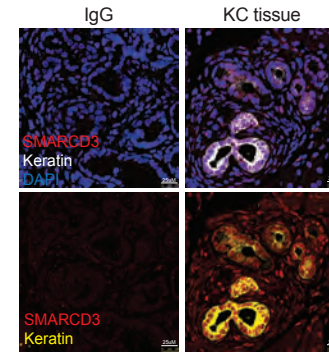

e. *Smarcd3* expression is regulated by KRAS: qPCR

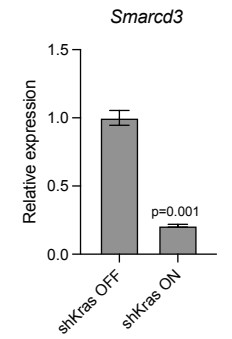

f. SMARCD3 protein knockdown in FG cells

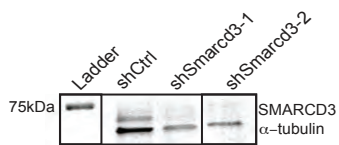

g. Representative FACS plots for PDX analysis

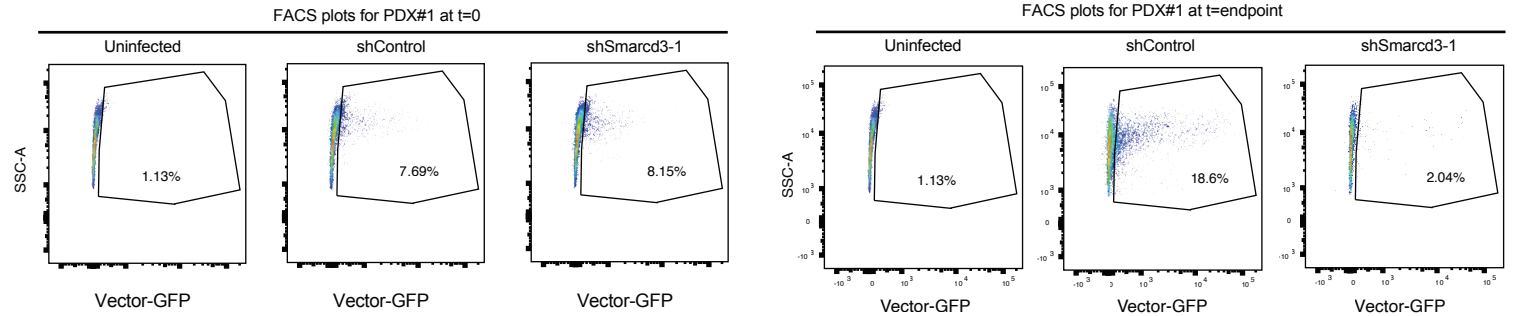

### Supplementary Figure 3: SMARCD3 knockdown blocks tumor growth in human models of PDAC

- a. The frequency of *SMARCD3*<sup>+</sup> cells is increased in the stem fraction of primary human PDAC tumors by single-cell RNA-seq. After gating on EpCAM<sup>+</sup> tumor cells, plots are shown for *SMARCD3*, *PROM1* (CD133<sup>+</sup>), and *MSI2* expressing cells by single-cell RNA-seq (see Figure 3b).
- b. *SMARCD3* expression in a human tissue microarray. *SMARCD3* expression was assessed by IHC in a cohort of PDAC patients; samples were scored as negative (no expression, left) or positive (any *SMARCD3* expression in the nuclei/cytoplasm, middle; or nuclei alone, right) (representative, n=116 cases at n=10 spots/case, scale bar = 200um).
- c. *SMARCD3* expression is elevated within *KRAS*<sup>MUTANT</sup> human pancreatic tumors. *SMARCD3* expression was analyzed by IHC in a human tissue microarray where patient tumors were also sequenced (Supplementary Figure 3b). Although non-significant (chi squared test), *SMARCD3* expression was most associated with *KRAS* mutation; 58% of *KRAS*<sup>MUTANT</sup> tumors expressed *SMARCD3* compared to only 17% of *KRAS*<sup>WT</sup> tumors.
- d. *SMARCD3* is expressed in the context of mutant *Kras* alone in GEMMs. *SMARCD3* (red) was expressed in PanINs (pan-keratin<sup>+</sup>, white/yellow) in *Kras*<sup>G12D/+</sup>; *Ptf1a-Cre* (KC) mice; DAPI (blue) (representative, n=3 mice, scale bar = 25um).
- e. *Smarcd3* expression is regulated by *Kras*. *KP<sup>ff</sup>C* tumor cells were transduced with a doxycycline-inducible and GFP-tagged *Kras* shRNA; GFP- (sh*Kras* off) and GFP+ (sh*Kras* on) cells were sorted for qPCR (n=3 for n=3 biological replicates, two-tailed T-test, mean ± SEM).
- f. *SMARCD3* knockdown in FG cells. Human FG PDAC cells transduced with *Smarcd3* shRNA were collected for western blot analysis ( $\alpha$ -tubulin loading control, representative, n=2).
- g. Representative FACS plots for patient-derived xenograft (PDX) tumor analysis. The frequency of transduced GFP+EpCAM<sup>+</sup> PDX tumor cells was analyzed by FACS 48 h post-transduction (t=0). At endpoint (12 weeks), xenograft tumors were dissociated, and analyzed by FACS. Frequency of GFP<sup>+</sup> tumor cells are plotted and are gated through live, single EpCAM-PE<sup>+</sup> cells (see also Figure 3k).

All source data are provided as a Source Data file.

a. SMARCD3 is associated with canonical BAF and PBAF complexes in *KP<sup>fl</sup>*C cells

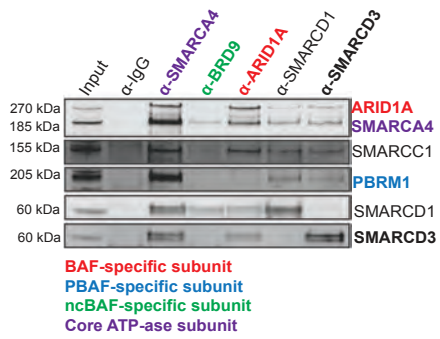

b. BAF complex is most abundant SWI/SNF complex variant in *KP<sup>fl</sup>*C cells

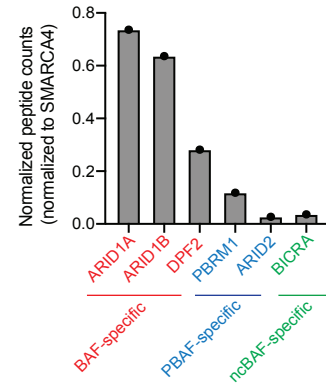

c. SMARCD3/FOXA1 interaction is absent in *Smarcd3<sup>KO</sup>* tumors by proximity ligation assay

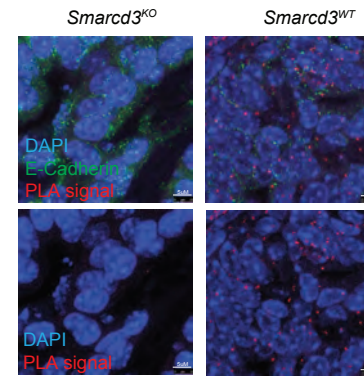

d. SMARCD3/FOXA1 interaction is absent in proximity ligation assay controls

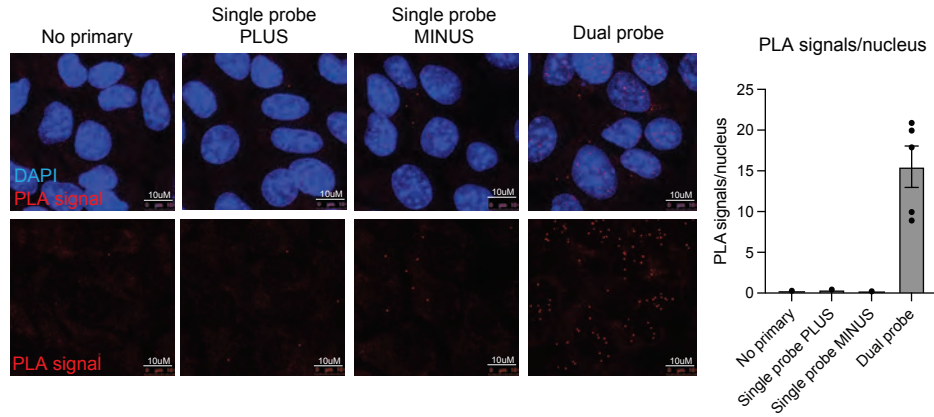

e. SMARCD3/FOXA1 interaction is detected by co-immunoprecipitation

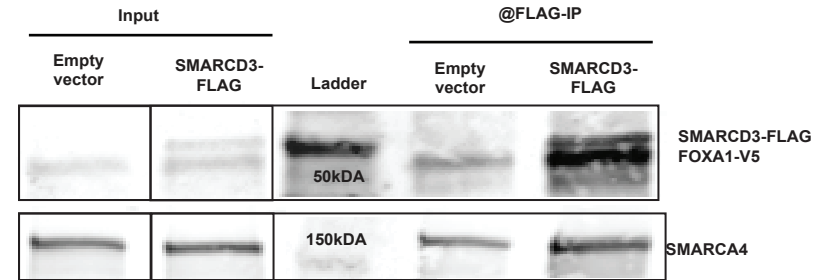

f. FOXA1 is required for the 3D growth of *KP<sup>fl</sup>*C cells *in vitro*

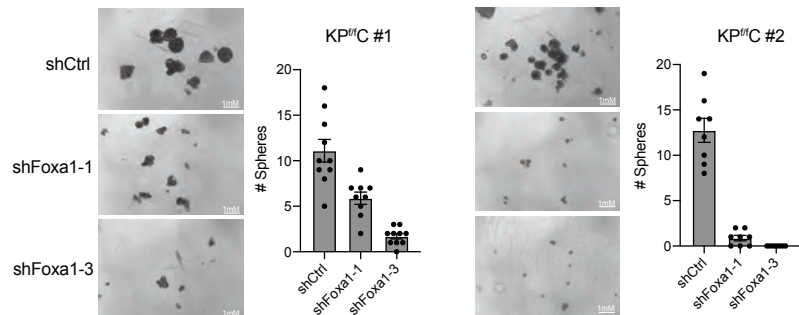

**Supplementary Figure 4: SMARCD3 regulates the epigenetic landscape and BAF complex binding at FOXA1 binding sites in mouse pancreatic cancer cells**

- a. SMARCD3/Baf60c is associated with canonical BAF and PBAF complexes in *KP<sup>fl/fl</sup>* C cells. Immunoprecipitation (IP) followed by western blot using antibodies against variant-specific SWI/SNF (BAF) complex subunits showed SMARCD3 is associated with BAF (ARID1A) and PBAF (PBRM1) as well as the core ATP-ase subunit SMARCA4 in *KP<sup>fl/fl</sup>* C cells. SMARCD3 does not associate with ncBAF (BRD9) (n=1).
- b. BAF is the most abundant SWI/SNF complex variant in *KP<sup>fl/fl</sup>* C cells. *KP<sup>fl/fl</sup>* C cells were collected and SMARCA4 was immunoprecipitated (IP) from the lysates; lysate from the IP was used for mass spectrometry (MS) analysis of SMARCA4-associated proteins. Counts were normalized to bait (SMARCA4); canonical BAF complex members ARID1A, ARID1B, and DPF2 were more abundant than PBAF members PBRM1/ARID2 or ncBAF member BICRA.
- c. SMARCD3/FOXA1 interaction is absent in *Smarcd3<sup>KO</sup>* tumors by proximity ligation assay (PLA). Using antibodies against FOXA1 and SMARCD3, PLA signal (red) was absent in *Smarcd3<sup>KO</sup>-KPF* tumor cells (E-Cadherin, green), serving as a control for the specificity of the PLA reaction; DAPI (blue) (representative from n=2 mice, n=5 frames/tumor, scale bar = 5um; see Figure 4e).
- d. SMARCD3/FOXA1 interaction is absent in proximity ligation assay controls. We ran proximity ligation for SMARCD3/FOXA1 using cells stained with no primary antibody and dual probes (left), dual antibodies and single probes (middle), and dual antibodies and probes (complete reaction, right). Although non-specific PLA signal (red) can be detected, it is rarely localized in the nuclei (DAPI, blue). PLA signal was <0.5/nuclei in all controls while nuclear PLA signal was >15/nuclei in the complete reaction in *KP<sup>fl/fl</sup>* C cells (n=1 biological replicate at n=1 frame for probe controls, n=1 biological replicate for dual probe reaction at n=5 frames, scale bar = 10um, mean ± SEM).
- e. SMARCD3/FOXA1 interaction is detected by co-immunoprecipitation. SMARCD3-FLAG or empty GFP vector were over-expressed in 293T cells stably co-expressing FOXA1-V5. Cells were collected for co-immunoprecipitation with anti-FLAG. FOXA1-V5 and SMARCA4 co-immunoprecipitated with SMARCD3-FLAG (representative, n=2).
- f. FOXA1 is required for the 3D growth of *KP<sup>fl/fl</sup>* C cells *in vitro*. *KP<sup>fl/fl</sup>* C cell lines were transduced with *Foxa1* shRNA and plated in sphere-forming conditions (representative images from n=2 biological replicates, n=8 and n=10 wells each, mean ± SEM, scale bar = 1mm).

All source data are provided as a Source Data file.



a. Results of GSEA analysis suggest SMARCD3 regulates FOXA1-dependent genes and programs involved in cell cycle, translation, and metabolism

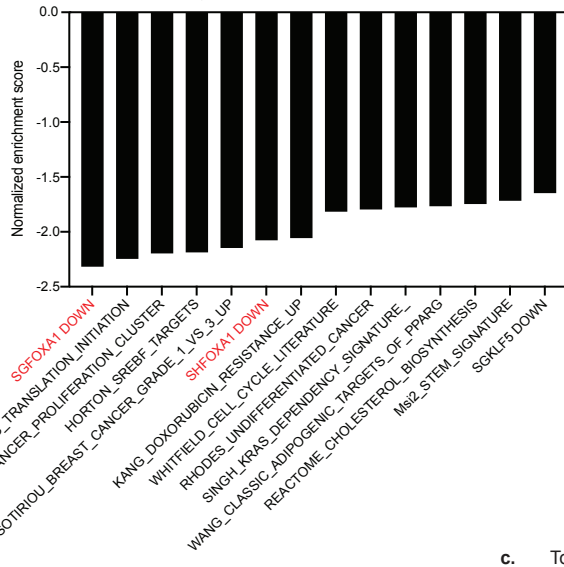

b. Gene ontology analysis implicates *Smarcd3* in the regulation of lipid metabolism

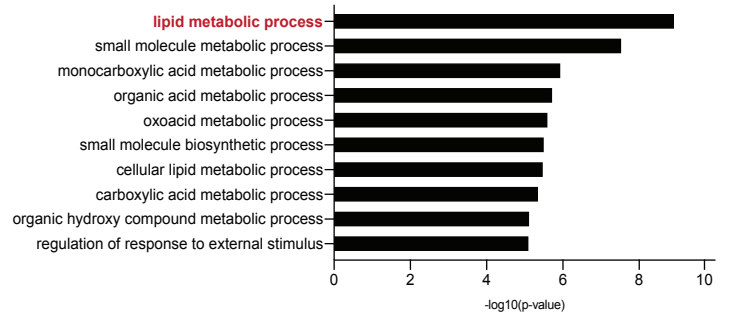

c. Total free fatty acids are down in *Smarcd3-KPF-R26-CreER<sup>T2</sup>* tumors treated with tamoxifen

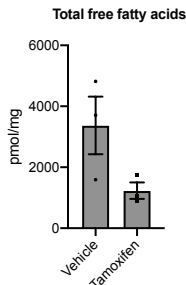

d. GC-MS profiling of free fatty acids in *Smarcd3-KPF-R26-CreER<sup>T2</sup>* tumor cells *in vivo*

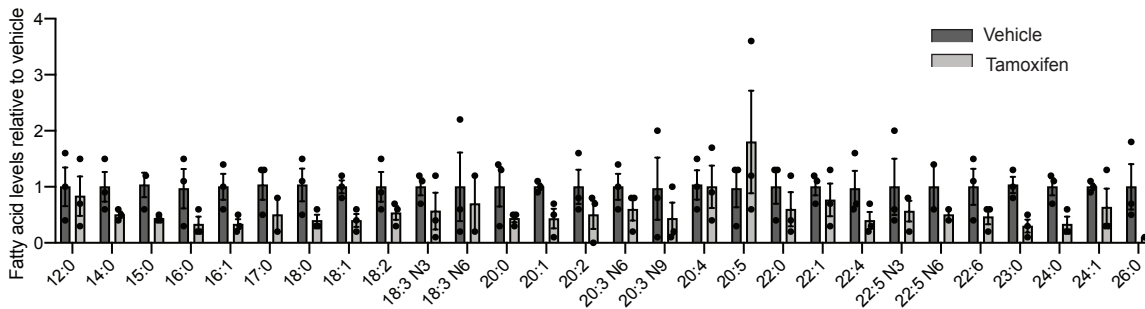

e. Expression of SMARCA4 and SMARCD3 in the normal adult mouse pancreas

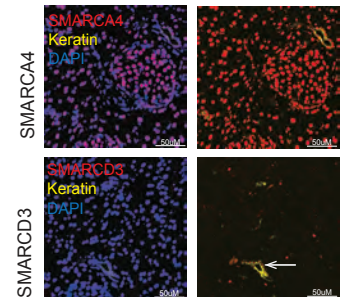

f. SMARCD3 expression in *KP<sup>flC</sup>* cells is sensitive to glucose *in vitro*

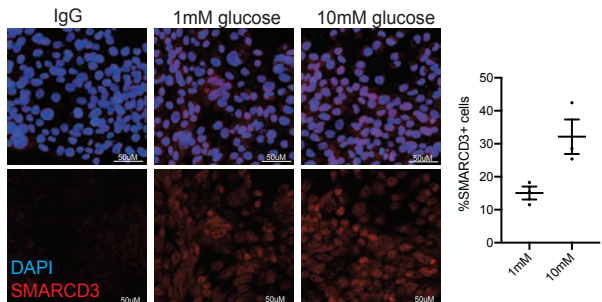

g. SMARCD3 protein stability is enhanced at higher glucose levels *in vitro*

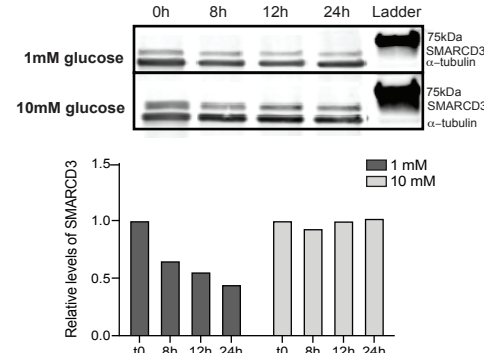

h. SMARCD3 mRNA stability is not impacted by glucose levels *in vitro*

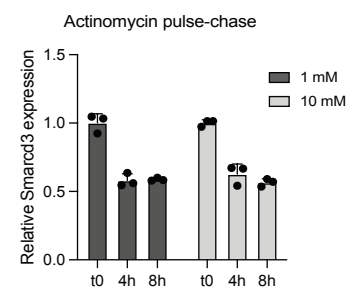

### Supplementary Figure 5: SMARCD3 regulates transcriptional networks implicated in lipid metabolism

- a. Genes down-regulated by *Smarcd3* knockdown are enriched within FOXA1-regulated gene sets. Gene set enrichment analysis (GSEA) on our RNA-seq dataset revealed a significant enrichment for two FOXA1-regulated gene sets within genes down-regulated by *Smarcd3* knockdown ( $fdr < 0.15$ ).
- b. Gene ontology analysis implicates *Smarcd3* in the regulation of lipid metabolism. Gene ontology (GO) analysis of RNA-seq genes down-regulated by *Smarcd3* knockdown were enriched (Fisher's exact test) for GO annotations in metabolism; lipid metabolic process was the most significantly enriched GO term.
- c. Total free fatty acid levels are reduced in tamoxifen-treated *Smarcd3<sup>fl/fl</sup>-KPF-R26-CreER<sup>T2</sup>* tumors. EpCAM+ tumor cells from *Smarcd3<sup>fl/fl</sup>-KPF-R26-CreER<sup>T2</sup>* tumors treated with vehicle or tamoxifen were isolated for free fatty acid analysis by GC-MS ( $n=3$  tumors, mean  $\pm$  SEM).
- d. GC-MS profiling of free fatty acids in *Smarcd3<sup>fl/fl</sup>-KPF-R26-CreER<sup>T2</sup>* tumors EpCAM+ tumor cells from *Smarcd3<sup>fl/fl</sup>-KPF-R26-CreER<sup>T2</sup>* tumors treated with vehicle or tamoxifen were isolated for free fatty acid analysis by GC-MS; all species are shown here ( $n=3$  tumors per group, mean  $\pm$  SEM).
- e. Expression of SMARCA4 and SMARCD3 in the normal adult mouse pancreas. SMARCA4 or SMARCD3 (red) expression in epithelium (pan-keratin+, yellow) of adult mouse pancreatic tissue (8 weeks old); nuclei stained with DAPI (blue); pancreatic ductal structure denoted with white arrow (representative from  $n=2$  mice, scale bar = 50 $\mu$ m).
- f. SMARCD3 expression is sensitive to glucose. *KP<sup>fl/fl</sup>C* cells were cultured to >75% confluency in 2D on in media containing 1mM or 10mM glucose; slides were analyzed for the frequency of nuclear (DAPI, blue) SMARCD3+ (red) cells by immunofluorescence (representative images from  $n=2$  replicates at  $n=3$  frames, mean  $\pm$  SEM, scale bar = 50 $\mu$ m).
- g. SMARCD3 protein stability is enhanced at higher glucose levels *in vitro*. *KP<sup>fl/fl</sup>C* cells were cultured in 1mM or 10mM glucose for 24 h; media was then refreshed with 1mM or 10mM glucose media containing 100 $\mu$ g/mL cycloheximide. Cells were collected at 0h, 8h, 12h, and 24h and SMARCD3 levels were analyzed by western blot ( $\alpha$ -tubulin loading control, representative,  $n=2$ ).
- h. SMARCD3 mRNA stability is not impacted by glucose levels *in vitro*. *KP<sup>fl/fl</sup>C* cells were cultured in 1mM or 10mM glucose for 24 h; media was then refreshed with 1mM or 10mM glucose media containing 10ng/mL actinomycin. Cells were collected at 0h, 4h, and 8h and *Smarcd3* transcript levels were analyzed by qPCR (expression normalized to b2M). Representative of  $n=3$  biological replicates at  $n=3$ , mean  $\pm$  SEM.

All source data provided in the Source Data file.

Supplementary Table 1

Lipid metabolism-associated genes annotated within all lipid-associated subnetwork hubs

| Function                | Genes                                                                            |
|-------------------------|----------------------------------------------------------------------------------|
| Lipid transport/storage | Vldlr, Ldlr, Fabp4, Dgat2, Mogat2                                                |
| Metabolic regulation    | Pparg, Srebf2                                                                    |
| Cholesterol metabolism  | Lss, Hmgcr, Soat2, Pmvk, Fdps, Hmgcs1, Idi1, Mvd, Mvk, Nsdhl, Sqle, Ephx2, Dhcr7 |
| Prostaglandin synthesis | Ptgs1, Ptgs2, Ptges                                                              |
| Fatty acid synthesis    | Scd1, Acss1, Acss2, Elovl1, Elovl7                                               |
| Beta oxidation          | Ech1, Acads, Acat1, Acat2, Decr1, Echs1, Eci1                                    |

Supplementary Table 2: Antibodies

| Antibody target            | Application                            | Source                      | Catalogue #                  | Dilution                     |
|----------------------------|----------------------------------------|-----------------------------|------------------------------|------------------------------|
| EpCAM-APC                  | FACS, mouse tissue                     | eBioscience                 | 17-5791-82                   | 2ug/106 cells                |
| CD45-PeCy7                 | FACS, mouse tissue                     | eBioscience                 | 25-0451-82                   | 2ug/106 cells                |
| CD31-PE                    | FACS, mouse tissue                     | eBioscience                 | 12-0311-82                   | 2ug/106 cells                |
| PDGFRa-BV421               | FACS, mouse tissue                     | BD Biosciences              | 566293                       | 2ug/106 cells                |
| CD133-APC                  | FACS, mouse tissue                     | eBioscience                 | 17-1331-81                   | 2ug/106 cells                |
| BrDU-APC                   | FACS, mouse tissue                     | BD Biosciences              | 552598                       | 2ug/106 cells                |
| CD133-PE                   | FACS, mouse tissue                     | BD Biosciences              | 12-1331-82                   | 2ug/106 cells                |
| AnnexinV-APC               | FACS, mouse tissue                     | eBioscience                 | 88-8007-72                   | 2ug/106 cells                |
| EpCAM-PE                   | FACS, human tissue                     | ThermoFisher                | 12-9326-42                   | 2ug/106 cells                |
| CD133-BV421                | FACS, human tissue                     | BD Biosciences              | 566598                       | 2ug/106 cells                |
| CD133-APC                  | FACS, human tissue                     | Milltenyi                   | 130-113-746                  | 2ug/106 cells                |
| $\alpha$ -tubulin          | Western blot                           | Abcam                       | ab7291                       | 1:10,000                     |
| SMARCD2                    | Western blot                           | Abcam                       | ab221168                     | 1:500                        |
| SMARCD1                    | Western blot                           | BD Biosciences              | 611728                       | 1:500                        |
| SMARCD3                    | Western blot                           | Abcam                       | ab204745                     | 1:1,000                      |
| igG                        | IP-Western, IP-MS                      | Cell Signaling Technologies | 2729S                        | 1:100 (IP)                   |
| SMARCA4                    | IP-Western, IP-MS, ColP-Western, ChIP  | Abcam                       | ab110641                     | 1:100 (IP), 1:1000 (Western) |
| BRD9                       | IP-Western                             | Active Motif                | 61537                        | 1:100 (IP), 1:1000 (Western) |
| ARID1A                     | IP-Western                             | Santa Cruz                  | sc-32761                     | 1:100 (IP), 1:1000 (Western) |
| SMARCD1                    | IP-Western                             | Santa Cruz                  | sc-135843                    | 1:100 (IP), 1:1000 (Western) |
| SMARCD3                    | IP-Western                             | Cell Signaling Technologies | 62265                        | 1:100 (IP), 1:1000 (Western) |
| FLAG                       | ColP-Western                           | ThermoFisher                | MA1-91878                    | 1:1,000                      |
| V5                         | ColP-Western                           | ThermoFisher                | R960-25                      | 1:1,000                      |
| Biotinylated anti-rabbit   | Immunofluorescence                     | Millipore sigma             | AP187B                       | 1:200                        |
| SMARCD3                    | Immunofluorescence, PLA (mouse tissue) | Abcam                       | ab204745                     | 1:100                        |
| SMARCD3                    | Immunofluorescence (human tissue)      | Aviva Systems Biology       | ARP35652 P050, QC20007-43594 | 1:100-1:400                  |
| pan-cytokeratin            | Immunofluorescence                     | abcam                       | ab8068                       | 1:15                         |
| FOXA1                      | PLA                                    | ThermoFisher                | PA5-18168                    | 1:100                        |
| SMARCA4                    | PLA                                    | ThermoFisher                | A303-877A                    | 1:500                        |
| H3K27ac                    | ChIP                                   | abcam                       | ab4729                       | 1:100                        |
| ARID1A                     | ChIP                                   | Cell Signaling Technologies | 12354                        | 1:100                        |
| FOXA1                      | ChIP                                   | Abcam                       | ab170933                     | 1:100                        |
| KLF5                       | ChIP                                   | Abcam                       | ab24331                      | 1:100                        |
| H3K4me                     | ChIP                                   | Abcam                       | ab8895                       | 1:100                        |
| H3K4me3                    | ChIP                                   | Millipore sigma             | 05-745                       | 1:100                        |
| AlexaFluor-568 anti-rabbit | Immunofluorescence                     | Thermo Fisher               | A11036                       | 1:500                        |
| AlexaFluor-488 anti-mouse  | Immunofluorescence                     | Thermo Fisher               | A11001                       | 1:500                        |
| AlexaFluor-647 anti-mouse  | Immunofluorescence                     | Thermo Fisher               | A-21240                      | 1:500                        |
| AlexaFluor-488 anti-rabbit | Immunofluorescence                     | Thermo Fisher               | A-11008                      | 1:500                        |
| AlexaFluor-568 anti-mouse  | Immunofluorescence                     | Thermo Fisher               | A-11004                      | 1:500                        |

Supplementary Table 3: Reagents, plasmids, software, and algorithms

| <b>Commerical reagents</b>               | <b>Source</b>            |
|------------------------------------------|--------------------------|
| HBSS                                     | Gibco, Life Technologies |
| DMEM                                     | Gibco, Life Technologies |
| Pen/Strep                                | Gibco, Life Technologies |
| Non-essential amino acids                | Gibco, Life Technologies |
| FC block                                 | BD Bioscience            |
| MEM                                      | Gibco, Life Technologies |
| Gey's balanced salt solution             | Sigma                    |
| Collagenase P                            | Roche                    |
| Dnase I                                  | Roche                    |
| Rho Kinase inhibitor Y-27632             | SelleckChem              |
| RBC lysis buffer                         | eBioscience              |
| Matrigel                                 | BD Bioscience            |
| DMEM-F12                                 | Gibco, Life Technologies |
| B27 supplement                           | Gibco, Life Technologies |
| B-mercaptoethanol                        | Gibco, Life Technologies |
| N2 supplement                            | Gibco, Life Technologies |
| mEGF                                     | Gibco, Life Technologies |
| bFGF2                                    | Gibco, Life Technologies |
| 3D CellTiterGlo Assay                    | Promega                  |
| Celecoxib                                | SelleckChem              |
| Lovastatin                               | SelleckChem              |
| Etomoxir                                 | SelleckChem              |
| TOFA                                     | SelleckChem              |
| CAY-10566                                | SelleckChem              |
| Fatostatin                               | SelleckChem              |
| Advanced DMEM-F12                        | ThermoFisher             |
| HEPES pH 7.2-7.5                         | ThermoFisher             |
| Glutamax                                 | ThermoFisher             |
| Primocin                                 | Invivogen                |
| Nicotinamide                             | Sigma                    |
| N-acetyl cysteine                        | Sigma                    |
| mNoggin                                  | Peprotech                |
| hEGF                                     | Peprotech                |
| hFGF                                     | Peprotech                |
| hGastrin                                 | Tocris                   |
| A83-01                                   | Tocris                   |
| Cell Recovery Solution                   | Corning                  |
| TrypLE Express                           | ThermoFisher             |
| BrDU flow cytometry kit                  | BD Bioscience            |
| Annexin V apoptosis kit                  | eBioscience              |
| Tamoxifen                                | Sigma                    |
| Corn oil                                 | Sigma                    |
| Gemcitabine                              | Sigma                    |
| Pronase                                  | Sigma                    |
| Propidium Iodide                         | Life Technologies        |
| 4X Laemmli buffer                        | Biorad                   |
| 4-15% precast Mini-PROTEAN TGX gel       | Biorad                   |
| Odyssey buffer                           | Li-cor                   |
| FLAG magnetic beads                      | ThermoFisher             |
| FLAG peptide                             | ThermoFisher             |
| 10% formalin                             | Millipore Sigma          |
| Human PDAC TMA                           | US Biomax, Inc           |
| Citrate Buffer                           | eBioscience              |
| Triton-X 100                             | Sigma                    |
| Normal goat serum                        | Fisher Scientific        |
| 4% paraformaldehyde                      | Fisher Scientific        |
| Bovin serum albumin                      | Invitrogen               |
| DAPI                                     | Molecular probes         |
| DuoLink PLA detection kit, red           | Millipore Sigma          |
| Glucose solution                         | ThermoFisher             |
| Actinomycin                              | Cayman chemical          |
| Cycloheximide                            | Cayman chemical          |
| Disuccinimidyl glutarate                 | Sigma                    |
| Protein A+G Dynabeads                    | Invitrogen               |
| NuGen Ovation Ultralow Library System V2 | Tecan                    |
| Nuclear Co-IP kit                        | Active Motif             |

Supplementary Table 3 continued: Reagents, plasmids, software, and algorithms

**Plasmids**

|                                   |                                         |
|-----------------------------------|-----------------------------------------|
| FG12 lentiviral vector            | Qin et al. 2003 <sup>1</sup>            |
| lentiCRISPRv2                     | Sanjana et al. 2014 <sup>2</sup>        |
| SMARCD3 GFP overexpression vector | Albini et al. 2013, 2014 <sup>3,4</sup> |

**Software and algorithms**

|                               |                                             |
|-------------------------------|---------------------------------------------|
| 10X Genomics Cell Ranger v3.0 | Zheng et al. 2017 <sup>5</sup>              |
| Seurat v3.1 R Package         | Satija et al. 2015 <sup>6</sup>             |
| HOMER v4.8                    | Heinz et al. 2010 <sup>7</sup>              |
| GSEA desktop 4.0.3            | Subramanian et al. 2005 <sup>8</sup>        |
| STRING interactome 1.5.1      | Szkarczyk et al. 2015 <sup>9</sup>          |
| Cytoscape v3.8.2              | Shannon et al. 2003 <sup>10</sup>           |
| clusterMaker2 2.2             | Morris et al. 2011 <sup>11</sup>            |
| QuPath v0.2.3                 | Bankhead et al. 2017 <sup>12</sup>          |
| ImageJ version 1.50i          | Schneider et al. 2012 <sup>13</sup>         |
| FlowJo v10.5.3                | Beckton Dickson                             |
| Graphpad PRISM v8.2.0         | GraphPad                                    |
| Umap 0.3.8                    | McInnes, L., & Healy, J. 2018 <sup>14</sup> |
| STAR v2.5                     | Dobin et al. 2013 <sup>15</sup>             |
| DESEQ2 3.15                   | Love et al. 2014 <sup>16</sup>              |
| FACS Diva v6.1.3.             | Beckton Dickson                             |
| Scorenado                     | Github                                      |

Supplementary Table 4: Oligonucleotide sequences

**shRNA oligos**

| Mouse       | Target sequence       |
|-------------|-----------------------|
| shControl   | GCAGTTATCTGGAAGATCAGG |
| shSmarcd3-1 | TGCGCCTTTATATCTCCAATA |
| shSmarcd3-2 | ACATGGACCTCCTAGCATTG  |
| shKlf4      | AGTTGGACCCAGTATACATTC |
| shZic5      | ACTTGCCACCGGGTCTAATTA |
| shSox9      | GCGACGTCATCTCCAACATTG |
| shMeis2     | GACGGGCTCATCGAGACAATT |
| shZbtb12    | GAACGCCCTTAGCCAGTTCAT |
| shOct4      | CAAGTTGGCGTGGAGACTTTG |
| shFoxa1-1   | TAGTTCCTGCAGGGCTTATTT |
| shFoxa1-3   | GCGCTGCAGTACTCTCCTTAT |

Human

|             |                       |
|-------------|-----------------------|
| shControl   | GCAGTTATCTGGAAGATCAGG |
| shSmarcd3-1 | AGACGGCGTGCTATGACATTG |
| shSmarcd3-2 | AGCGGAAGCTGCGACTCTATA |
| shSmarcd3-3 | GACAAGTATTTCCAGCAGATT |

**CRISPR guides**

|           |                           |
|-----------|---------------------------|
| NT1       | CACCGGCGAGGTATTCGGCTCCGCG |
| sgSmarcd3 | GCCGCGGACGAAGTTGCCGGAGG   |
| sgMeis2   | TCTTCCAGTAAACTCCGCGAGG    |
| sgHdac11  | CTGGAGGGAGACCGCCTCGGGGG   |
| sgHdac7   | GTGCCCCGCCAGCCTTCGGAGG    |
| sgElf3    | GACCTCAGACAAGATCCCAAAGG   |

**qPCR primers**

|               | F                     | R                     |
|---------------|-----------------------|-----------------------|
| mouse Smarcd3 | AGGCTTACATGGACCTCCTAG | CATCAGAGTCTTCCGCATCAG |
| human Smarcd3 | GGAGCCGCAGTGCCAAGA    | TAAGCCTGGGACTCGGGGA   |

## Supplementary References

1. Qin, X. F., An, D. S., Chen, I. S. Y. & Baltimore, D. Inhibiting HIV-1 infection in human T cells by lentiviral-mediated delivery of small interfering RNA against CCR5. *Proc Natl Acad Sci U S A* **100**, 183–188 (2003).
2. Sanjana, N. E., Shalem, O. & Zhang, F. Improved vectors and genome-wide libraries for CRISPR screening. *Nature Methods* vol. 11 783–784 (2014).
3. Albin, S. & Puri, P. L. Generation of myospheres from hESCs by epigenetic reprogramming. *Journal of Visualized Experiments* **88**, 51243 (2014).
4. Albin, S., Coutinho, P., Malecova, B., Giordani, L., Savchenko, A., Forcales, S.V. and Puri, P.L. Epigenetic Reprogramming of Human Embryonic Stem Cells into Skeletal Muscle Cells and Generation of Contractile Myospheres. *Cell Reports* **3**, 661–670 (2013).
5. Zheng, G. X. Y. *et al.* Massively parallel digital transcriptional profiling of single cells. *Nature Communications* **8**, 1–12 (2017).
6. Satija, R., Farrell, J. A., Gennert, D., Schier, A. F. & Regev, A. Spatial reconstruction of single-cell gene expression data. *Nature Biotechnology* **33**, 495–502 (2015).
7. Heinz, S., Benner, C., Spann, N., Bertolino, E., Lin, Y.C., Laslo, P., Cheng, J.X., Murre, C., Singh, H. and Glass, C.K. Simple Combinations of Lineage-Determining Transcription Factors Prime cis-Regulatory Elements Required for Macrophage and B Cell Identities. *Molecular Cell* **38**, 576–589 (2010).
8. Subramanian, A., Tamayo, P., Mootha, V.K., Mukherjee, S., Ebert, B.L., Gillette, M.A., Paulovich, A., Pomeroy, S.L., Golub, T.R., Lander, E.S. and Mesirov, J.P. Gene set enrichment analysis: a knowledge-based approach for interpreting genome-wide expression profiles. *Proc Natl Acad Sci U S A* **102**, 15545–15550 (2005).
9. Szklarczyk, D., Franceschini, A., Wyder, S., Forslund, K., Heller, D., Huerta-Cepas, J., Simonovic, M., Roth, A., Santos, A., Tsafou, K.P. and Kuhn, M. STRING v10: Protein-protein interaction networks, integrated over the tree of life. *Nucleic Acids Research* **43**, D447–D452 (2015).
10. Shannon, P., Markiel, A., Ozier, O., Baliga, N.S., Wang, J.T., Ramage, D., Amin, N., Schwikowski, B. and Ideker, T. Cytoscape: A software Environment for integrated models of biomolecular interaction networks. *Genome Research* **13**, 2498–2504 (2003).
11. Morris, J.H., Apeltsin, L., Newman, A.M., Baumbach, J., Wittkop, T., Su, G., Bader, G.D. and Ferrin, T.E. ClusterMaker: A multi-algorithm clustering plugin for Cytoscape. *BMC Bioinformatics* **12**, (2011).
12. Bankhead, P., Loughrey, M.B., Fernández, J.A., Dombrowski, Y., McArt, D.G., Dunne, P.D., McQuaid, S., Gray, R.T., Murray, L.J., Coleman, H.G. and James, J.A. QuPath: Open source software for digital pathology image analysis. *Scientific Reports* **7**, 1–7 (2017).
13. Schneider, C. A., Rasband, W. S. & Eliceiri, K. W. NIH Image to ImageJ: 25 years of image analysis. *Nature Methods* vol. 9 671–675 (2012).
14. McInnes, L., & Healy, J. (2018). UMAP: Uniform Manifold Approximation and Projection for Dimension Reduction. *ArXiv e-prints*.
15. Dobin, A., Davis, C.A., Schlesinger, F., Drenkow, J., Zaleski, C., Jha, S., Batut, P., Chaisson, M. and Gingeras, T.R. STAR: ultrafast universal RNA-seq aligner. *Bioinformatics*, **29**(1), pp.15-21 (2013).
16. Love, M.I., Huber, W. and Anders, S. Moderated estimation of fold change and dispersion for RNA-seq data with DESeq2. *Genome biology*, **15**(12), pp.1-21 (2014).
