# Supplementary material for: Smarcd3 is an epigenetic modulator of the metabolic landscape in pancreatic ductal adenocarcinoma
Source: PubMed Central journal article supplement (PMC9849267; doi:10.1038/s41467-023-35796-7), 2023-01-18
Supplement: 41467_2023_35796_MOESM2_ESM.pdf [file 41467_2023_35796_MOESM2_ESM.pdf]

## Description of additional supplementary files

Supplementary Data 1:

Node genes within each functionally annotated subnetwork hub. Related to Figure 5d.

Supplementary Data 2:

Additional specific information on mice used for *in vivo* studies
